# Supplementary material
Source: PubMed Central journal article supplement (PMC9035124)
Supplement: NIHMS1787026-supplement-2.pdf [file NIHMS1787026-supplement-2.pdf]

Supporting Information

**In situ super-resolution imaging of organoids and extracellular matrix interactions via photo-transfer by allyl sulfide exchange expansion microscopy (PhASE-ExM)**

*Michael R. Blatchley<sup>#</sup>, Kemal Arda Günay<sup>#</sup>, F. Max Yavitt, Elijah M. Hawat,  
Peter J. Dempsey, Kristi S. Anseth<sup>\*</sup>*

**Table S1.** List of chemicals, reagents and antibodies used in this work:

| Full name                                                                   | Abbreviation used in the paper         | Supplier                     |
|-----------------------------------------------------------------------------|----------------------------------------|------------------------------|
| <b>Chemicals:</b>                                                           |                                        |                              |
| Sodium acrylate                                                             | NaAc                                   | eMolecules or Pfaltz & Bauer |
| Poly(ethylene glycol)-diacrylamide Mw 600 g/mol                             | PEGdiAcM                               | Creative PEGWorks            |
| Acrylamide                                                                  | AcM                                    | Sigma Aldrich                |
| 8-arm, 10000 g/mol poly(ethylene glycol), thiol-functionalized              | 8-arm, 10 kDa PEG-SH                   | Jenkem                       |
| Lithium phenyl-2,4,6-trimethylbenzoylphosphinate                            | LAP                                    | Sigma Aldrich                |
| 8-arm, 40000 g/mol poly(ethylene glycol), dibenzocyclooctyne functionalized | 8-arm, 40 kDa PEG-DBCO                 | [34]                         |
| allyl sulfide bis(propionamide PEG <sub>3</sub> -azide)                     | bis-azide functionalized allyl sulfide | [6]                          |
| <b>Reagents:</b>                                                            |                                        |                              |
| 6-((acryloyl)amino)hexanoic Acid, Succinimidyl Ester                        | Acryloyl-X                             | ThermoFisher                 |
| Matrigel Growth Factor Reduced (GFR) Advanced DMEM/F-12                     | Matrigel                               | Corning                      |
| GlutaMAX Supplement                                                         | GlutaMAX                               | ThermoFisher                 |
| HEPES (1M)                                                                  | HEPES                                  | ThermoFisher                 |
| Penicillin-Streptomycin                                                     |                                        | ThermoFisher                 |
| N-2 Supplement (100x)                                                       | N2                                     | ThermoFisher                 |
| B27 Supplement (50x), serum free                                            | B27                                    | ThermoFisher                 |
| Recombinant Murine Epidermal Growth Factor                                  | EGF (E)                                | PeproTech                    |
| Recombinant Murine Noggin                                                   | N                                      | PeproTech                    |
| R-spondin conditioned media                                                 | R-spondin (R)                          | Dempsey Lab                  |
| CHIR99021                                                                   | CHIR (C)                               | Sigma Aldrich                |
| Valproic acid                                                               | VPA (V)                                | Sigma Aldrich                |
| TrypLE                                                                      |                                        | ThermoFisher                 |
| DNase I                                                                     |                                        | Sigma Aldrich                |
| N-acetylcysteine                                                            | NAC                                    | Sigma Aldrich                |
| Y-27632                                                                     |                                        | Selleck Chemicals            |
| Fetal bovine serum                                                          | FBS                                    | Gibco                        |
| Thiazovivin                                                                 |                                        | Stemgent                     |
| Laminin, Mouse                                                              | Laminin                                | Corning                      |
| Phosphate buffered saline                                                   | PBS                                    | ThermoFisher                 |
| Paraformaldehyde (16%)                                                      | PFA                                    | Electron Microscopy Sciences |
| Glutaraldehyde (25%)                                                        | GA                                     | Electron Microscopy Sciences |
| Sodium borohydride                                                          | NaBH <sub>4</sub>                      | Sigma Aldrich                |
| Bovine Serum Albumin                                                        | BSA                                    | Fisher Scientific            |
| Goat Serum                                                                  |                                        | ThermoFisher                 |
| Triton-X® 100                                                               | Triton-X                               | Acros                        |
| Proteinase K                                                                |                                        | New England Biolabs          |
| Poly(lysine)                                                                |                                        | Sigma Aldrich                |
| Ethylenediaminetetraacetic acid (0.5 M in pH 8)                             | EDTA                                   | ThermoFisher                 |
| 4',6-Diamidine-2'-phenylindole                                              | DAPI                                   | Sigma Aldrich                |

dihydrochloride

| <b>Antibodies:</b>                         | <b>Dilution</b> | <b>Supplier and Catalog No</b>     |
|--------------------------------------------|-----------------|------------------------------------|
| Anti- $\alpha$ -tubulin (mouse, DM1A)      | 1:125           | Abcam, ab7291                      |
| Anti-E-cadherin (rabbit)                   | 1:100           | Cell Signaling Technologies, 24E10 |
| Anti-fibronectin (rabbit)                  | 1:200           | Abcam, ab2413                      |
| Anti-Collagen IV (rabbit)                  | 1:200           | Abcam, ab19808                     |
| Anti-laminin (rabbit)                      | 1:200           | Abcam, ab11575                     |
| Anti-CD29 (Integrin $\beta$ 1) (rat, 9EG7) | 1:250           | BD biosciences, 553715             |
| Donkey anti-Mouse IgG Alexa Fluor Plus 488 | 1:250           | ThermoFisher, A32766               |
| Goat anti-Rabbit IgG Alexa Fluor Plus 594  | 1:250           | ThermoFisher, A32740               |
| Goat anti-Rat IgG Alexa Fluor 488          | 1:250           | ThermoFisher, A-11006              |

**Table S2.** Composition of PhotoExM and PhASE-ExM formulations:

| <b>Expansion Factor</b> | <b>NaAc (wt%)</b> | <b>PEGdiAcM (wt%)</b> | <b>AcM (wt%)</b> | <b>8-arm, 10 kDa PEG-SH (wt%)</b> | <b>LAP (wt%)</b> |
|-------------------------|-------------------|-----------------------|------------------|-----------------------------------|------------------|
| 4.3x (Matrigel)         | 16                | 0.875                 | 3                | 6                                 | 0.2              |
| 3.25x (PEG-AIS)         | 16                | 0.875                 | 3                | 6                                 | 0.2              |

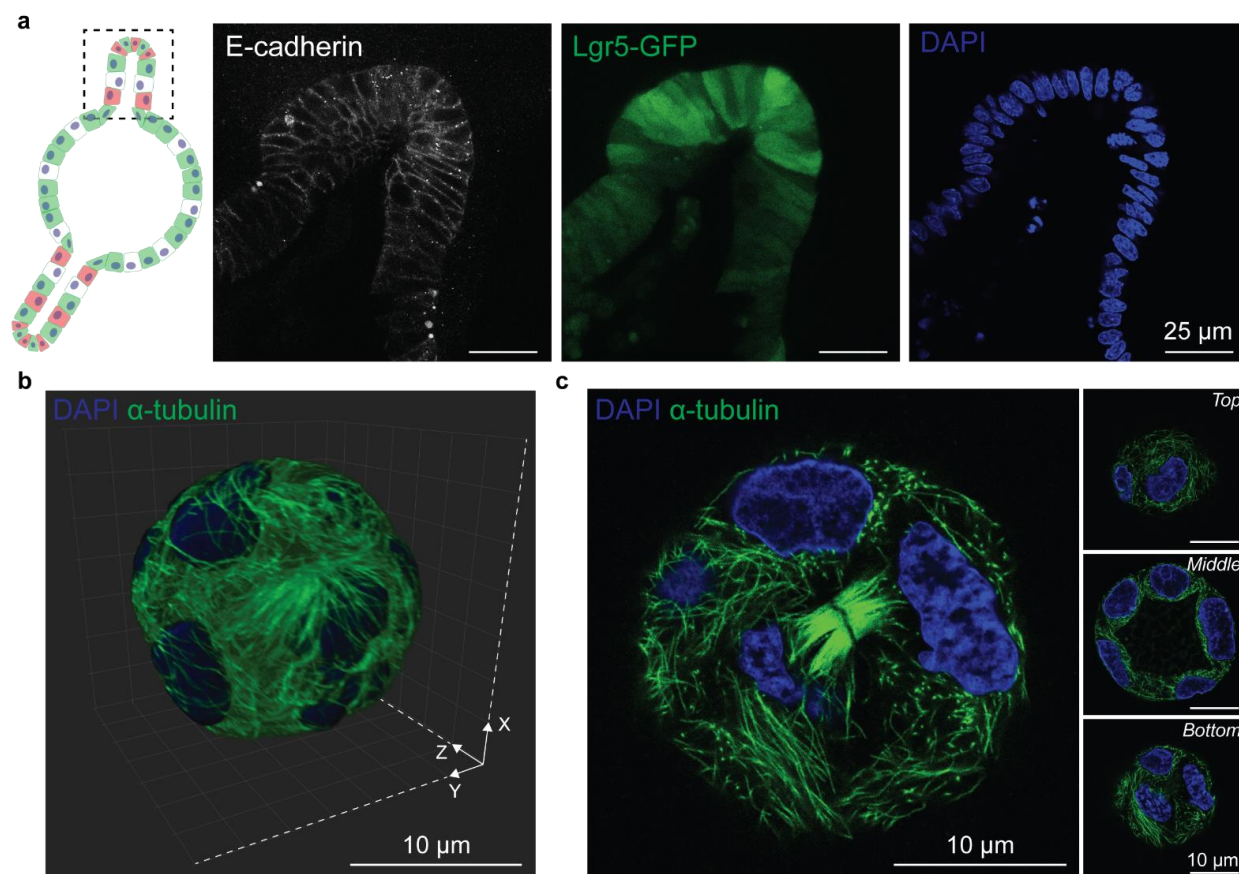

**Figure S1. PhotoExM of intestinal organoids cultured in Matrigel.** (a) PhotoExM imaging of the crypt region of an intestinal organoid for antibody immunolabeled proteins (E-cadherin), reporter fluorophores (Lgr5-GFP), and the cell nucleus (DAPI). (b) 3D reconstruction of a whole expanded organoid. (c) Single z plane image of an intestinal organoid (left) and single z planes taken at the top, middle, and bottom of the same organoid (right).

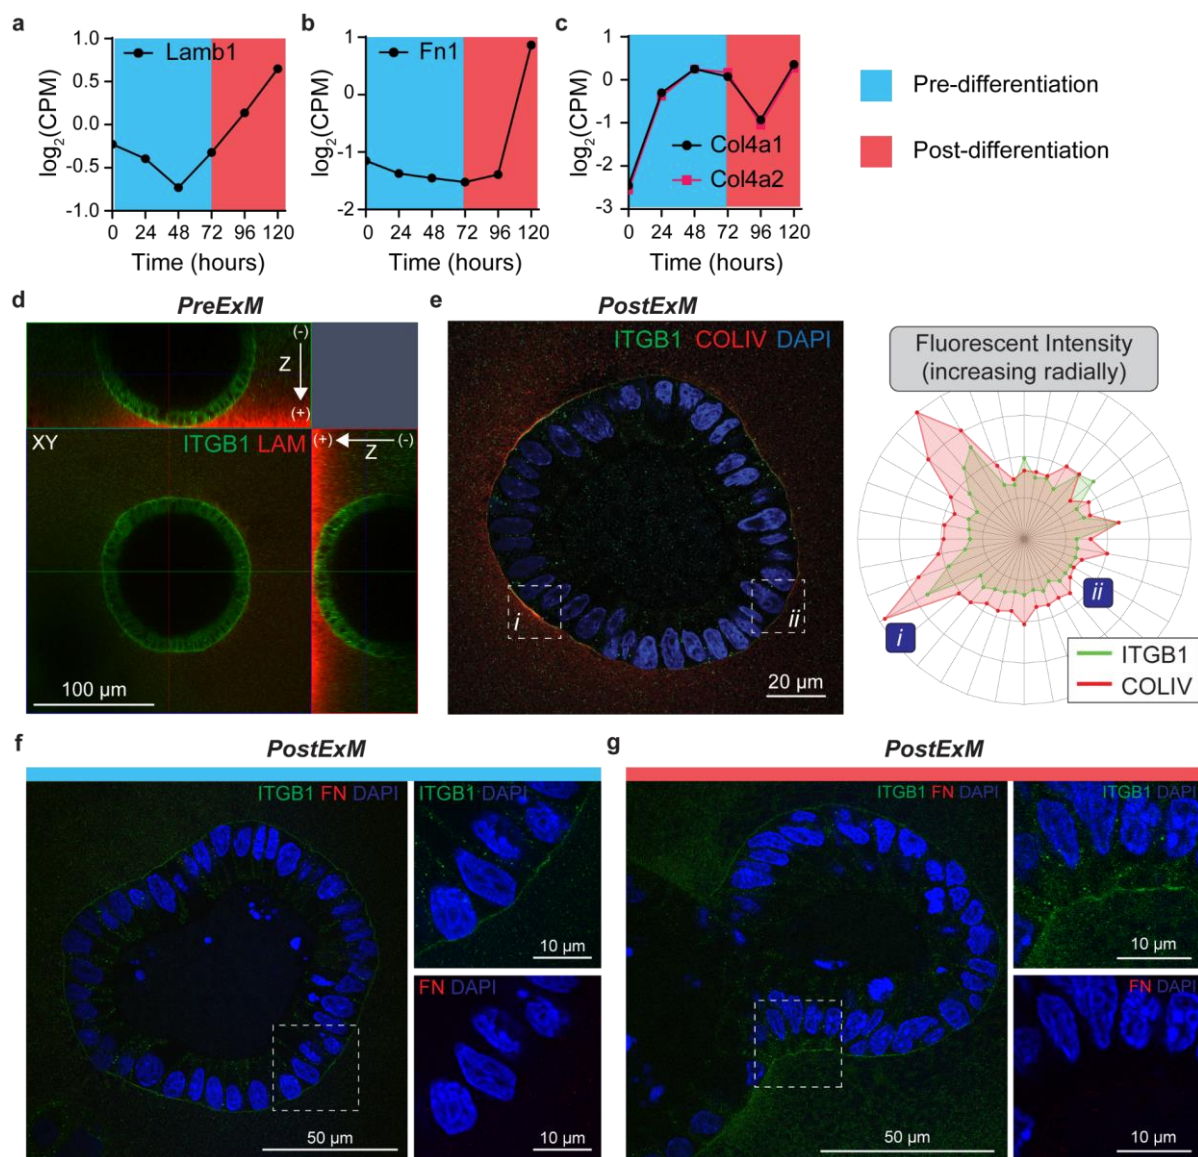

**Figure S2. Cell-ECM interactions of organoids cultured in Matrigel.** (a, b, c) RNA-sequencing mining for mRNA expression over the time course of organoid growth. (a) Lamb1 (laminin subunit B1), (b) Fn1 (fibronectin 1), and (c) Col4a1, Col4a2 (collagen type IV alpha 1 and 2) are all upregulated over time. (d) PreExM imaging of laminin (LAM) immunolabeled organoids cultured in Matrigel. Antibody saturation occurs only after several z planes, eliminating the ability to effectively image LAM surrounding organoids. (e) PostExM imaging of a pre-differentiated organoid (reproduced from Figure 3d). Analysis of fluorescent intensity of COLIV and ITGB1 on a cell-by-cell basis within the organoid. (f) Pre-differentiation and (g) post-differentiation PostExM images of organoids cultured in Matrigel and immunostained for ITGB1, FN, and DAPI. FN is almost completely absent at both stages of organoid growth.

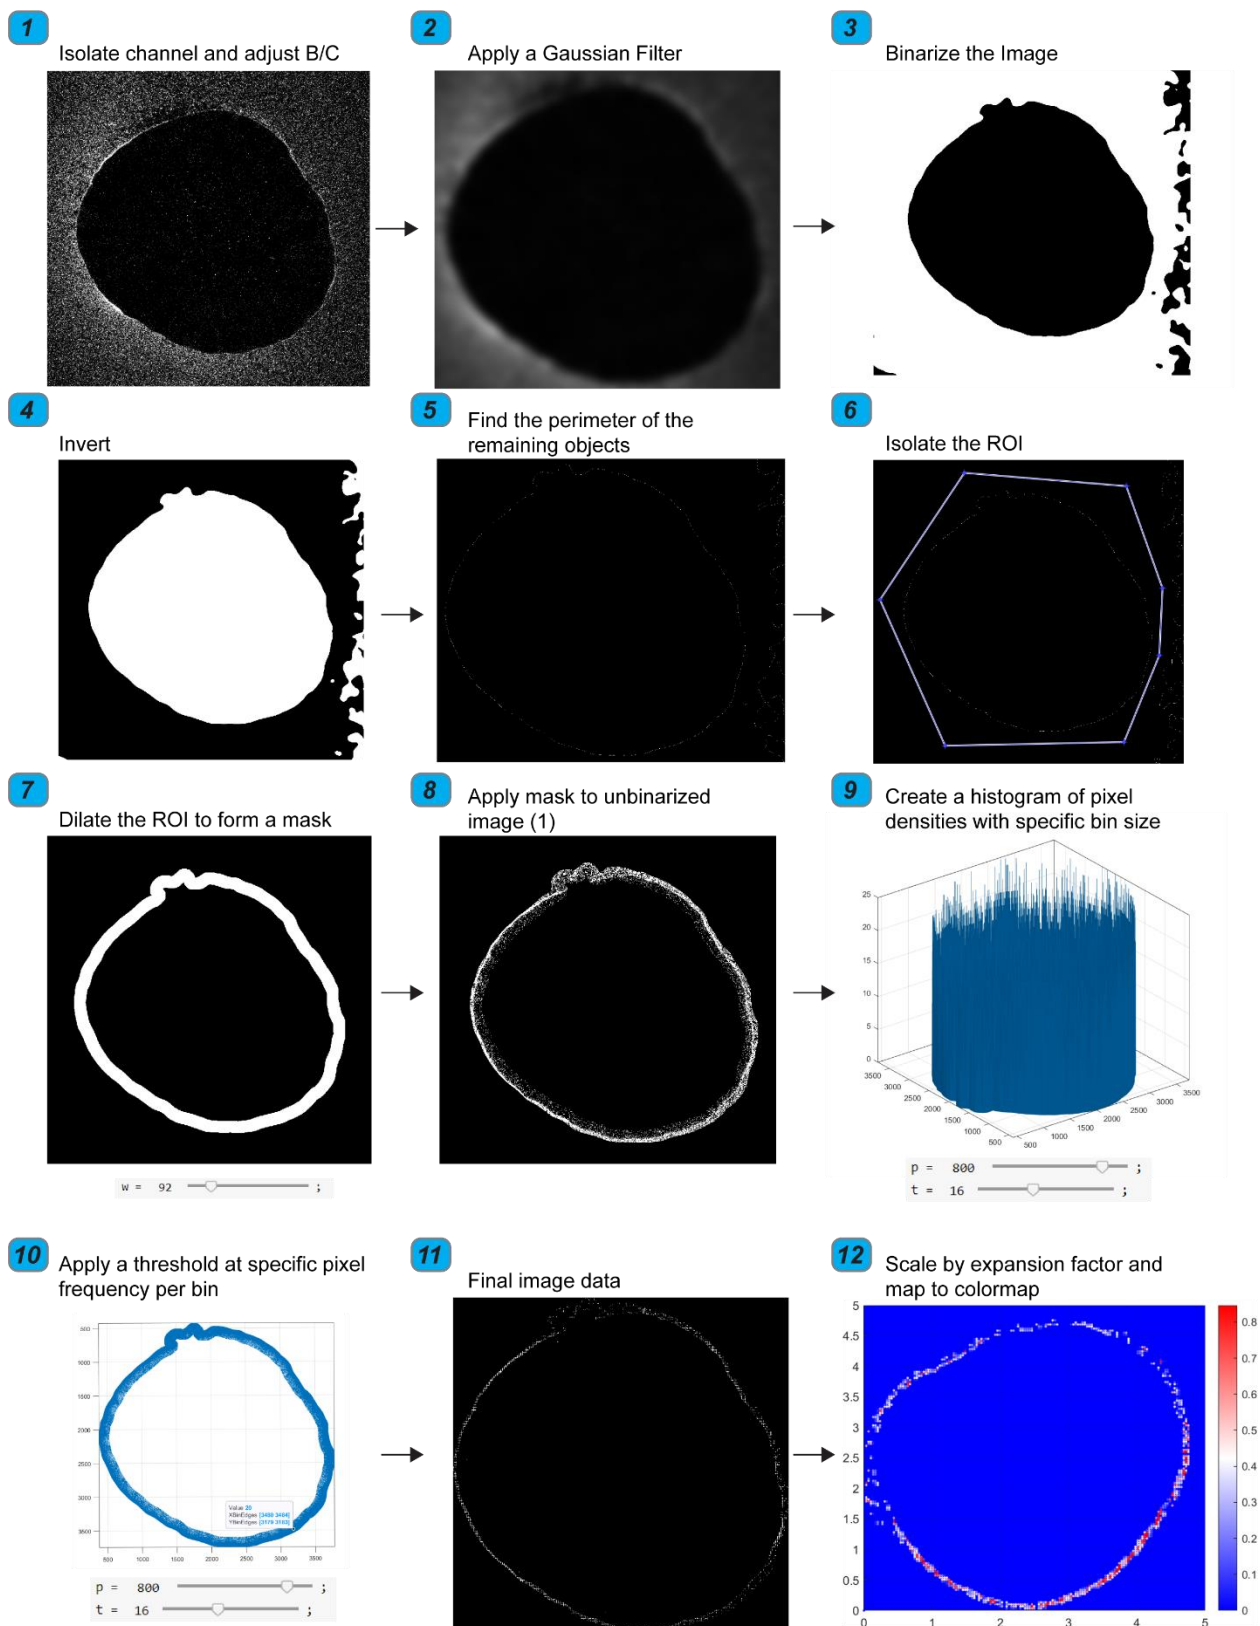

**Figure S3. Image analysis workflow.** A custom Matlab script was written to analyze cell-ECM interactions and ECM dynamics. (1) Images were split into individual channels and the brightness and contrast (B/C) was adjusted. (2) A Gaussian filter was first applied. (3) The image was binarized and (4) inverted. (5) The perimeter of the remaining objects was determined. (6) The ROI was isolated. (7) The ROI was dilated to create a mask. (8) The

mask overlaid on the unbinarized image (1). (9, 10) Within the masked region, a histogram of pixel densities was calculated and plotted. (11) Final image data for these histograms, visualized in 2D. (12) The image was scaled by the expansion factor to get convert to pre-expansion dimensions and a colormap of thickness measurements was generated.

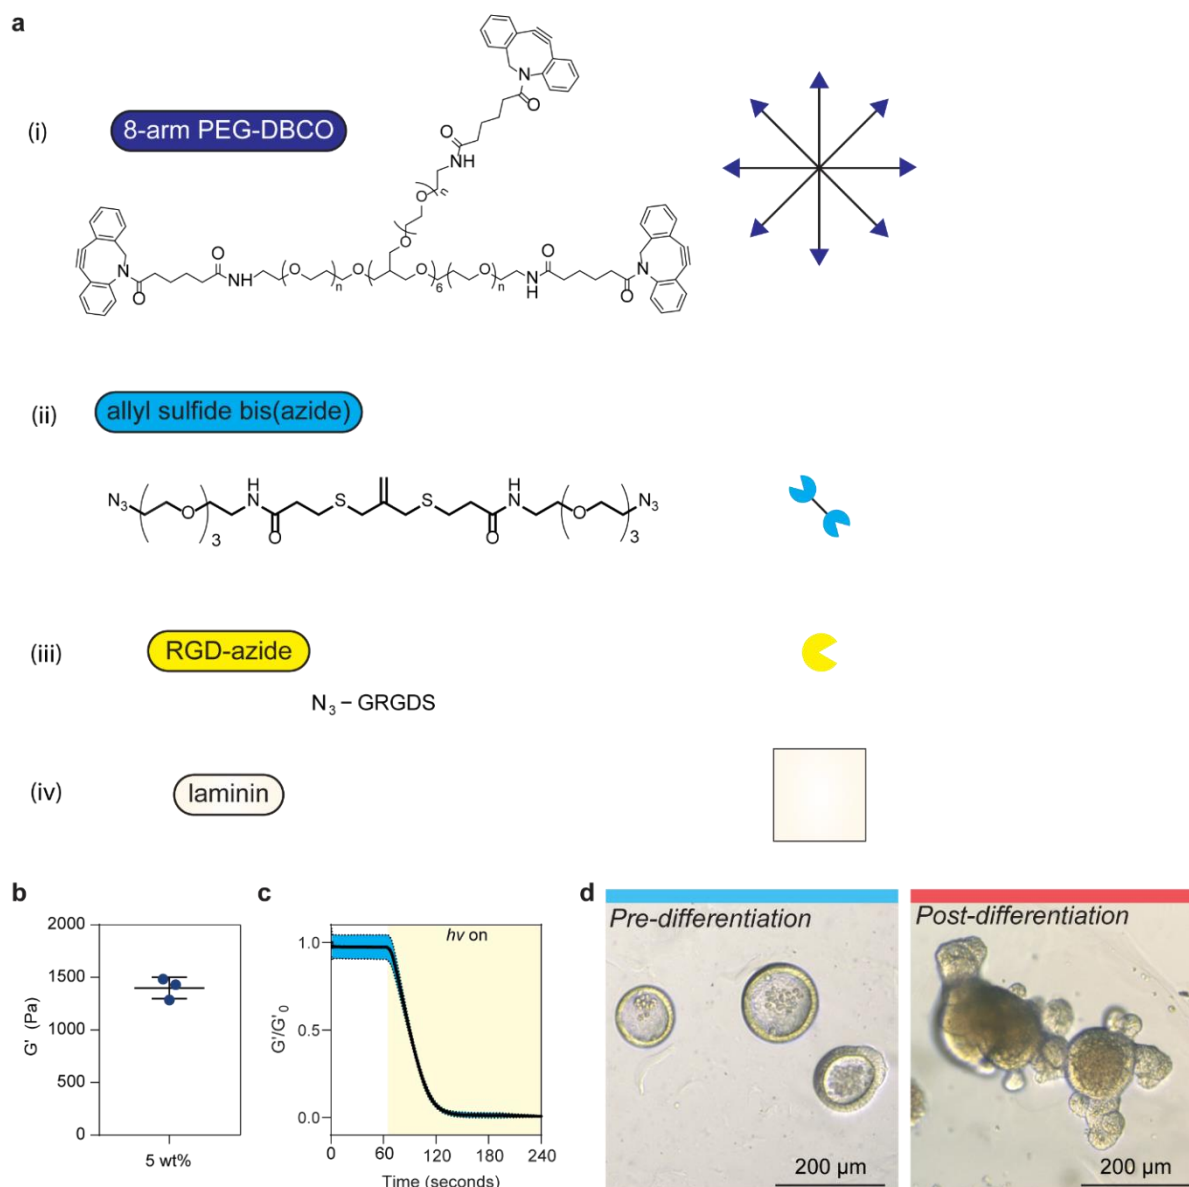

**Figure S4. Photodegradable PEG-AIS hydrogels for intestinal organoid growth and crypt formation.** (a) PEG-AIS hydrogels form via a strain promoted azide-alkyne cycloaddition (SPAAC) reaction between (i) an 8-arm, 20 kDa PEG-dibenzocyclooctyne (PEG-DBCO), and (ii) a bis-azide functionalized allyl sulfide. (iii) RGD-azide and (iv) laminin are also included in the PEG-AIS formulation. (b) Swollen rheology of the PEG-AIS hydrogels used in this study before photodegradation ( $G' \sim 1400$  Pa).  $n = 3$  hydrogels. (c)  $G'$  of PEG-AIS hydrogels is reduced when hydrogels are exposed to light (365 nm, 4.5 mW/cm<sup>2</sup>), LAP (1 mM), and GSH (15 mM).  $n = 3$  hydrogels. (d) Brightfield images pre-differentiation (left) and post-differentiation (right). When exposed to light for  $\sim 30$  s, the hydrogel modulus is reduced to  $\sim 0.5G'_0$ , which permits the formation of intestinal crypts.



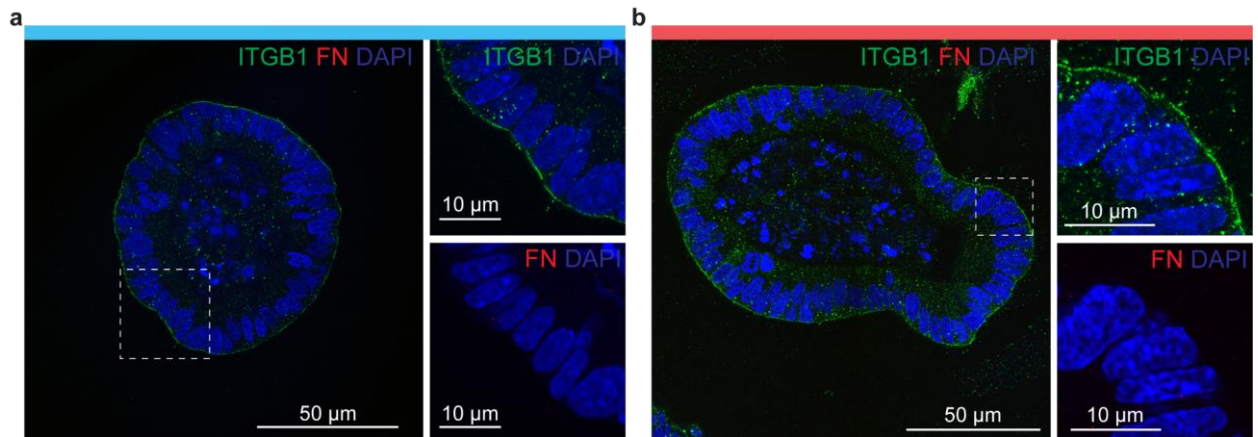

**Figure S5. FN immunostaining of organoids cultured in PEG-AIS hydrogels.** (a) Pre-differentiation and (b) post-differentiation PostExM images of organoids cultured in PEG-AIS hydrogels immunostained for ITGB1, FN, and DAPI. FN is almost completely absent at both stages of organoid growth in PEG-AIS hydrogels.

**Video S1.** 3D reconstruction of a PostExM organoid immunostained with  $\alpha$ -tubulin and DAPI. Image reconstruction performed in Imaris.
